# Supplementary material for: Mechanistic insights into encapsulation and release of drugs in colloidal niosomal systems: biophysical aspects
Source: Royal Society of Chemistry journal article supplement (doi:10.1039/d1ra06057k), 2021-01-01
Supplement: d1ra06057k1.pdf [file d1ra06057k1.pdf]

## Supplementary Information

### **Mechanistic insights into encapsulation and release of drugs in colloidal niosomal systems: Biophysical aspects**

Eva Judy<sup>a</sup>, Manu Lopus<sup>b</sup>, Nand Kishore<sup>a,\*</sup>

<sup>a</sup>Department of Chemistry, Indian Institute of Technology Bombay, Powai, Mumbai – 400 076, India.

<sup>b</sup>School of Biological Sciences, UM-DAE Centre for Excellence in Basic Sciences, Vidyanagari, Mumbai – 400 098.

Corresponding email address: [nandk@iitb.ac.in](mailto:nandk@iitb.ac.in)

**Table S1:** Analysis of particle size of niosomes (in the presence and absence of drugs) obtained by TEM using Image J software. The average size of the particles are mentioned in nm.

| S.No                                | Area     | Mean   | Min    | Max     | Angle   | Particle diameter (in nm) |
|-------------------------------------|----------|--------|--------|---------|---------|---------------------------|
| 1                                   | 1056.604 | 85.143 | 58     | 140     | 0       | 165.86                    |
| 2                                   | 1358.491 | 78.786 | 40.84  | 179.849 | 10.008  | 212.088                   |
| 3                                   | 981.132  | 86.206 | 54.08  | 144     | 4.574   | 154.064                   |
| 4                                   | 943.396  | 57.286 | 33.111 | 103     | -12.265 | 144.588                   |
| 5                                   | 830.189  | 79.84  | 35.19  | 149     | 10.784  | 131.321                   |
| 6                                   | 1245.283 | 17.868 | 0      | 64      | 1.79    | 196.67                    |
| 7                                   | 1283.019 | 65.315 | 33.394 | 153     | 1.736   | 202.81                    |
| 8                                   | 1132.075 | 83.817 | 49.241 | 181     | 5.906   | 179.096                   |
| 9                                   | 1320.755 | 19.486 | 0      | 64      | 0       | 208.86                    |
| 10                                  | 1094.34  | 65.241 | 32     | 107     | 0       | 172.003                   |
| 11                                  | 1094.34  | 75.78  | 50.5   | 142     | -2.045  | 172.112                   |
| 12                                  | 1245.283 | 38.583 | 17.781 | 99      | 1.79    | 196.67                    |
| 13                                  | 1245.283 | 67.488 | 32.094 | 189     | 8.881   | 198.96                    |
| 14                                  | 1207.547 | 95.354 | 51.323 | 173     | 9.162   | 192.893                   |
| Average particle diameter (in nm) = |          |        |        |         |         | 180.5711                  |

**Figure 2(a) analysis:**

**Figure 2(b) analysis:**

| S.No | Area     | Mean   | Min    | Max     | Angle   | Particle diameter (in nm) |
|------|----------|--------|--------|---------|---------|---------------------------|
| 1    | 1066.667 | 95.85  | 45.677 | 151.113 | -30.964 | 155.492                   |
| 2    | 1555.556 | 57.837 | 27.242 | 106     | 35.538  | 229.395                   |
| 3    | 1955.556 | 30.471 | 0      | 149     | 13.392  | 287.827                   |
| 4    | 1688.889 | 70.42  | 36.012 | 141     | -36.254 | 248.014                   |
| 5    | 1822.222 | 49.347 | 6.08   | 173.378 | 20.225  | 269.979                   |
| 6    | 1288.889 | 59.621 | 14.439 | 123     | 39.289  | 189.502                   |
| 7    | 1111.111 | 72.369 | 43     | 112.278 | 34.992  | 162.754                   |
| 8    | 1644.444 | 79.33  | 27.444 | 149     | 6.34    | 241.477                   |
| 9    | 2000     | 52.576 | 0      | 110.545 | 7.765   | 296.048                   |
| 10   | 1600     | 77.019 | 35.026 | 164     | 10.008  | 230.169                   |
| 11   | 1244.444 | 83.529 | 47.42  | 129     | 26.565  | 178.885                   |
| 12   | 1911.111 | 57.525 | 2.02   | 179     | 54.782  | 277.449                   |
| 13   | 1555.556 | 84.854 | 25.941 | 162.118 | 3.366   | 227.058                   |
| 14   | 1555.556 | 71.689 | 36.941 | 104.471 | 3.366   | 227.058                   |
| 15   | 1511.111 | 69.972 | 21.636 | 165     | 37.569  | 218.683                   |
| 16   | 1644.444 | 89.314 | 37.926 | 155.481 | 33.69   | 240.37                    |

|  |  |  |  |                                            |
|--|--|--|--|--------------------------------------------|
|  |  |  |  | Average particle diameter (in nm) = 230.01 |
|--|--|--|--|--------------------------------------------|

**Figure 2(c) analysis:**

| S.No | Area     | Mean    | Min     | Max                                         | Angle  | Particle diameter (in nm) |
|------|----------|---------|---------|---------------------------------------------|--------|---------------------------|
| 1    | 2904.69  | 68.319  | 16.213  | 143                                         | 2.437  | 365.949                   |
| 2    | 3025.719 | 70.656  | 7.143   | 158                                         | 8.297  | 377.346                   |
| 3    | 2481.089 | 70.683  | 20.25   | 132                                         | 8.531  | 314.645                   |
| 4    | 2239.032 | 62.782  | 16.889  | 113                                         | 3.18   | 280.479                   |
| 5    | 2602.118 | 53.153  | 8.333   | 119                                         | 1.364  | 326.815                   |
| 6    | 2057.489 | 59.907  | 19.138  | 147                                         | 10.62  | 253.269                   |
| 7    | 1694.402 | 114.179 | 73.889  | 172                                         | 6.34   | 211.328                   |
| 8    | 1815.431 | 80.78   | 47.372  | 127.03                                      | 15.945 | 226.531                   |
| 9    | 2118.003 | 76.591  | 36.503  | 136                                         | 10.305 | 260.919                   |
| 10   | 1694.402 | 83.422  | 53.58   | 130                                         | 21.801 | 209.459                   |
| 11   | 2178.517 | 66.289  | 21.82   | 129                                         | 25.115 | 274.923                   |
| 12   | 1694.402 | 82.402  | 53.272  | 130                                         | 15.068 | 209.459                   |
| 13   | 1996.974 | 83.433  | 48.738  | 131                                         | 34.695 | 245.997                   |
| 14   | 1331.316 | 116.687 | 68.825  | 184                                         | 41.186 | 165.386                   |
| 15   | 1391.831 | 104.167 | 70.998  | 174                                         | 18.435 | 172.198                   |
| 16   | 1149.773 | 107.006 | 74.5    | 144                                         | 3.18   | 140.24                    |
| 17   | 1573.374 | 108.38  | 75.472  | 154.424                                     | 11.768 | 190.707                   |
| 18   | 1210.287 | 129.999 | 107.158 | 183                                         | 15.524 | 145.326                   |
|      |          |         |         | Average particle diameter (in nm) = 242.832 |        |                           |

**Figure 2(d) analysis:**

| S.No | Area | Mean    | Min    | Max                                          | Angle   | Particle diameter (in nm) |
|------|------|---------|--------|----------------------------------------------|---------|---------------------------|
| 1    | 1750 | 89.545  | 75.228 | 166                                          | 28.072  | 240.416                   |
| 2    | 1550 | 89.963  | 81.14  | 114                                          | 43.668  | 215.058                   |
| 3    | 1650 | 99.174  | 82.75  | 112                                          | 29.745  | 228.035                   |
| 4    | 1750 | 85.374  | 71.706 | 97.353                                       | 30.379  | 237.697                   |
| 5    | 2300 | 84.398  | 66.351 | 157                                          | 44.091  | 315.04                    |
| 6    | 1950 | 77.471  | 67.363 | 126                                          | 35.362  | 268.794                   |
| 7    | 1750 | 77.796  | 69.519 | 117                                          | 15.255  | 241.868                   |
| 8    | 1800 | 75.749  | 64.176 | 108                                          | 30.964  | 247.386                   |
| 9    | 1550 | 77.215  | 61.79  | 180                                          | 45      | 210                       |
| 10   | 1900 | 99.266  | 80.1   | 160                                          | -43.919 | 265.047                   |
| 11   | 1600 | 106.783 | 96.228 | 114.809                                      | -13.134 | 217.83                    |
| 12   | 1600 | 88.086  | 75.199 | 131                                          | -38.367 | 216.449                   |
| 13   | 1250 | 74.335  | 66.083 | 83.167                                       | 2.386   | 169.853                   |
| 14   | 1550 | 153.432 | 86.38  | 254.967                                      | -64.29  | 211.896                   |
|      |      |         |        | Average particle diameter (in nm) = 234.6692 |         |                           |

**Figure 2(e) analysis:**

| S.No | Area | Mean    | Min     | Max     | Angle   | Particle diameter (in nm)                    |
|------|------|---------|---------|---------|---------|----------------------------------------------|
| 1    | 332  | 19.434  | 0       | 71.684  | -12.68  | 164                                          |
| 2    | 268  | 55.151  | 27.083  | 77.537  | -35.134 | 132.061                                      |
| 3    | 288  | 76.486  | 55.015  | 101.381 | -21.501 | 141.873                                      |
| 4    | 288  | 47.407  | 26.857  | 94      | 25.115  | 141.365                                      |
| 5    | 232  | 38.65   | 4.055   | 67.919  | 29.249  | 114.612                                      |
| 6    | 396  | 29.307  | 0.17    | 68.923  | -40.855 | 195.673                                      |
| 7    | 196  | 82.341  | 37.333  | 148.812 | -38.29  | 96.83                                        |
| 8    | 268  | 132.041 | 109.596 | 159.182 | 19.537  | 131.575                                      |
| 9    | 256  | 110.17  | 86.245  | 157.073 | -22.479 | 125.539                                      |
| 10   | 260  | 51.996  | 28.297  | 86.527  | -38.66  | 128.062                                      |
| 11   | 260  | 99.296  | 65.873  | 130.24  | -20.136 | 127.812                                      |
| 12   | 248  | 110.191 | 79.601  | 158     | -23.199 | 121.852                                      |
|      |      |         |         |         |         | Average particle diameter (in nm) = 135.1045 |

**Figure 2(f) analysis:**

| S.No | Area    | Mean    | Min    | Max     | Angle   | Particle diameter (in nm)                    |
|------|---------|---------|--------|---------|---------|----------------------------------------------|
| 1    | 220.134 | 31.821  | 0      | 254.728 | 48.013  | 132.26                                       |
| 2    | 209.396 | 29.347  | 1.729  | 124.675 | 106.557 | 126.491                                      |
| 3    | 163.758 | 79.647  | 56.311 | 115.9   | 34.216  | 99.069                                       |
| 4    | 174.497 | 98.233  | 69     | 160.234 | -48.814 | 104.503                                      |
| 5    | 144.966 | 97.246  | 71.279 | 148     | -55.713 | 87.255                                       |
| 6    | 153.02  | 117.767 | 88.939 | 165.204 | -37.694 | 91.108                                       |
| 7    | 244.295 | 100.452 | 53.406 | 188.462 | 20.854  | 147.28                                       |
|      |         |         |        |         |         | Average particle diameter (in nm) = 112.5666 |

**Scanning electron microscopy**

The niosomes were assessed using SEM to analyse morphological variations. This technique employs lower magnification than TEM and hence the changes caused by drug incorporation cannot be assessed by this method. Fig. S1 represents the cryo-SEM images of niosomes highlighting their distribution and surface morphology. The vesicular shape is spherical and consists of similar sizes (as observed in TEM) indicating the formation of majorly small unilamellar vesicles (SUV). The niosomes seen in the images are of nanometer size (around 100-

200 nm). The variation in the morphology of niosomes due to incorporation of drugs was observed as seen clearly in Fig S1 (B). The correlation of the size of the niosomes in the presence and absence of drugs was further done by employing DLS.

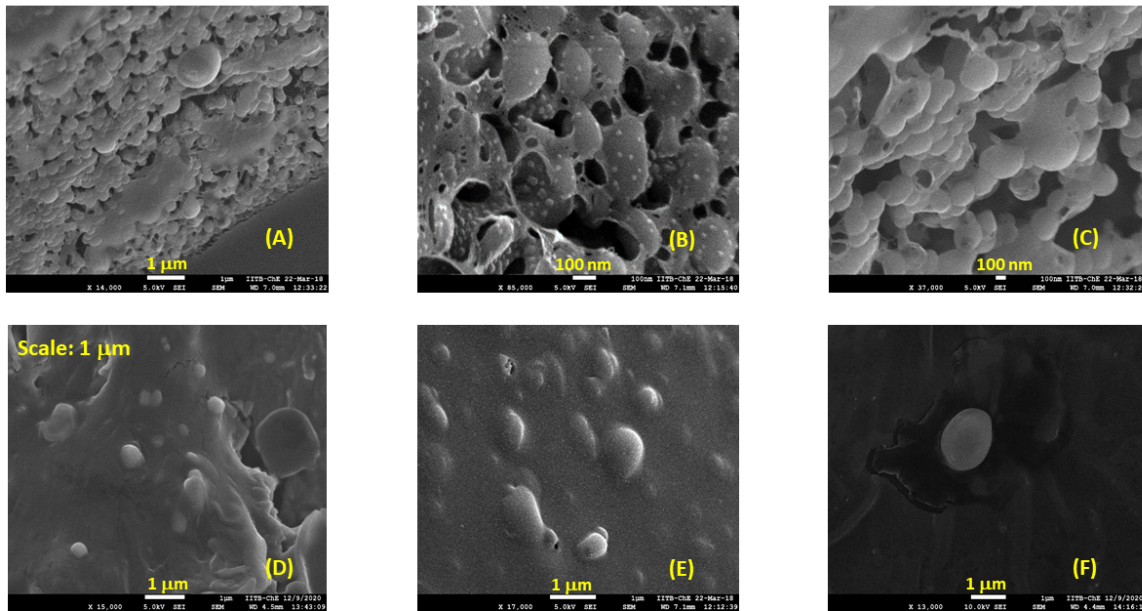

**Figure S1.** SEM images of (A) S60 niosomes, (B) S60+MTX niosomes, (C) S60+KTP niosomes, (D) S60-PEG niosomes, (E) S60-PEG+MTX niosomes and (F) S60-PEG+KTP niosomes.

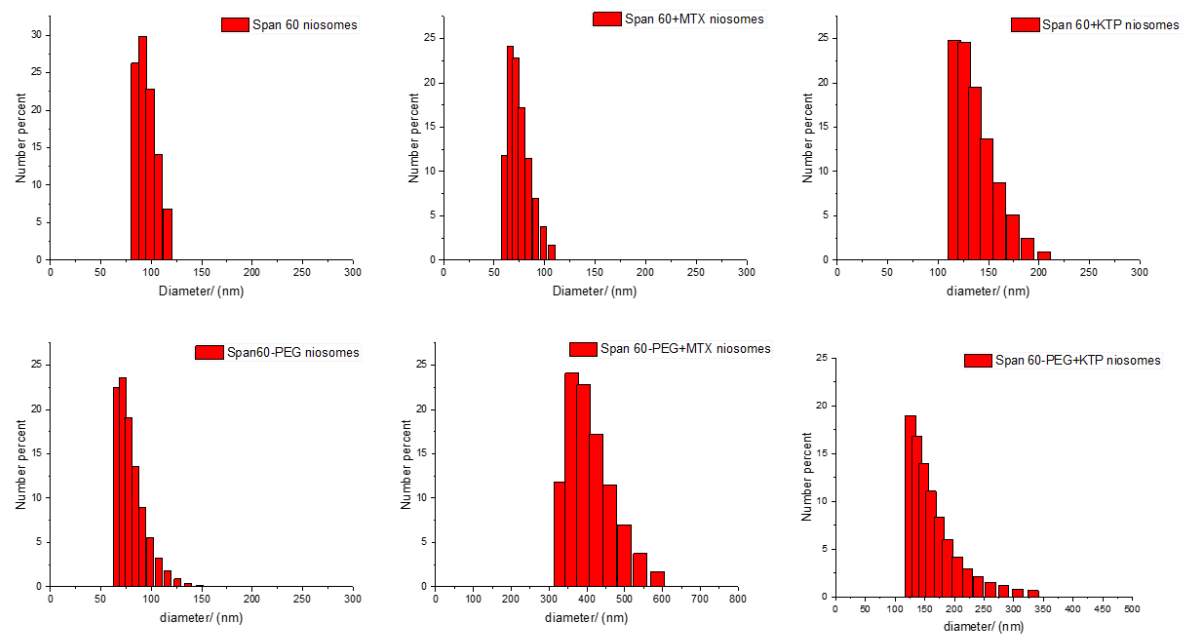

**Figure S2.** Size distribution of the vesicles represented as change in number percent with diameter of (A) S60 niosomes, (B) S60+MTX niosomes, (C) S60+KTP niosomes, (D) S60-PEG niosomes, (E) S60-PEG+MTX niosomes and (F) S60-PEG+KTP niosomes.

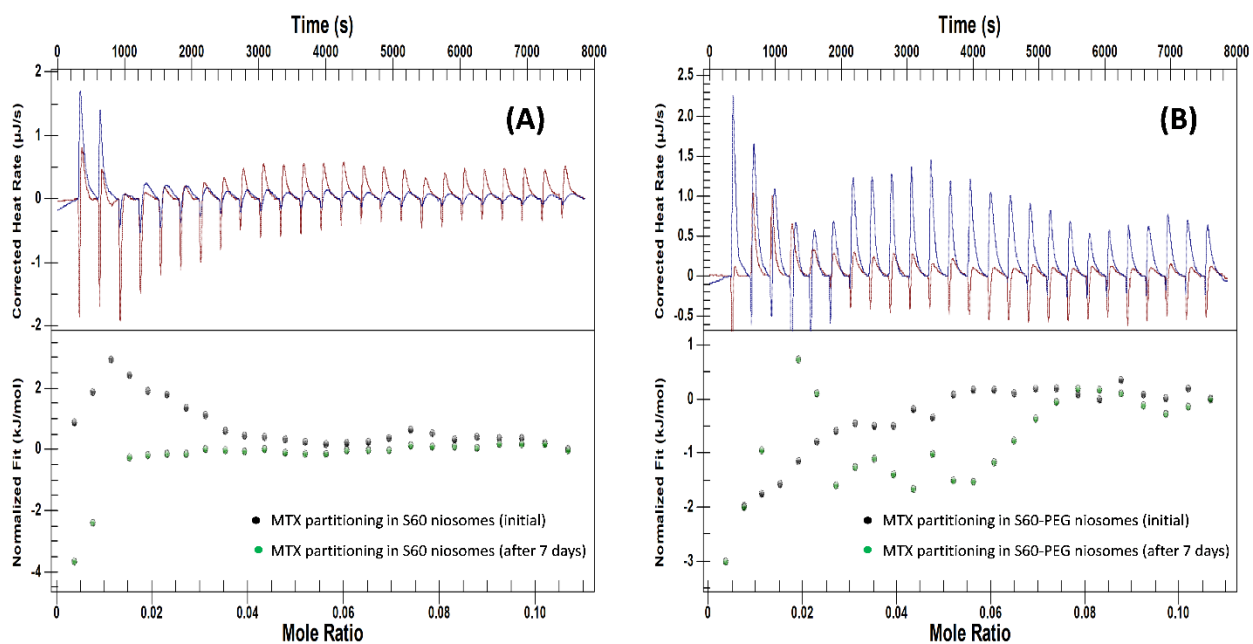

**Figure S3.** Interaction of MTX with (A) S60 niosomes and (B) S60-PEG niosomes in the initial period after formation of the niosomes (day-1) and after a period of 7 days at  $37^{\circ}\text{C}$ .

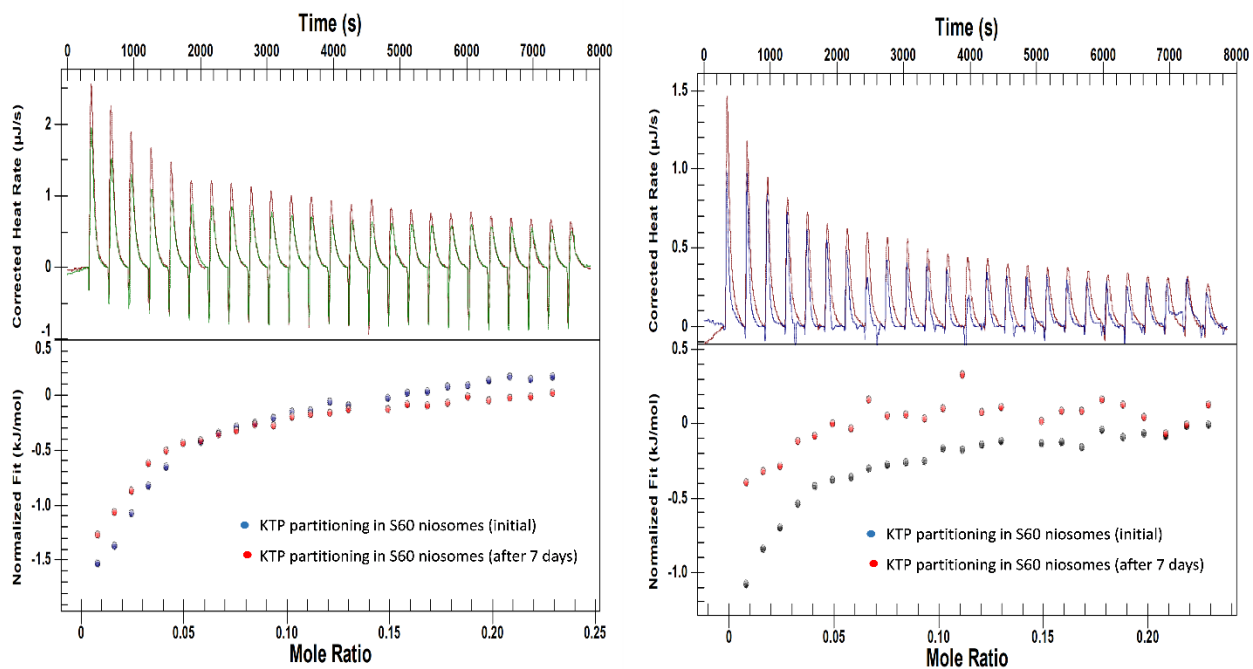

**Figure S4.** Interaction of KTP with (A) S60 niosomes and (B) S60-PEG niosomes in the initial period after formation of the niosomes (day-1) and after a period of 7 days at 37<sup>0</sup>C.



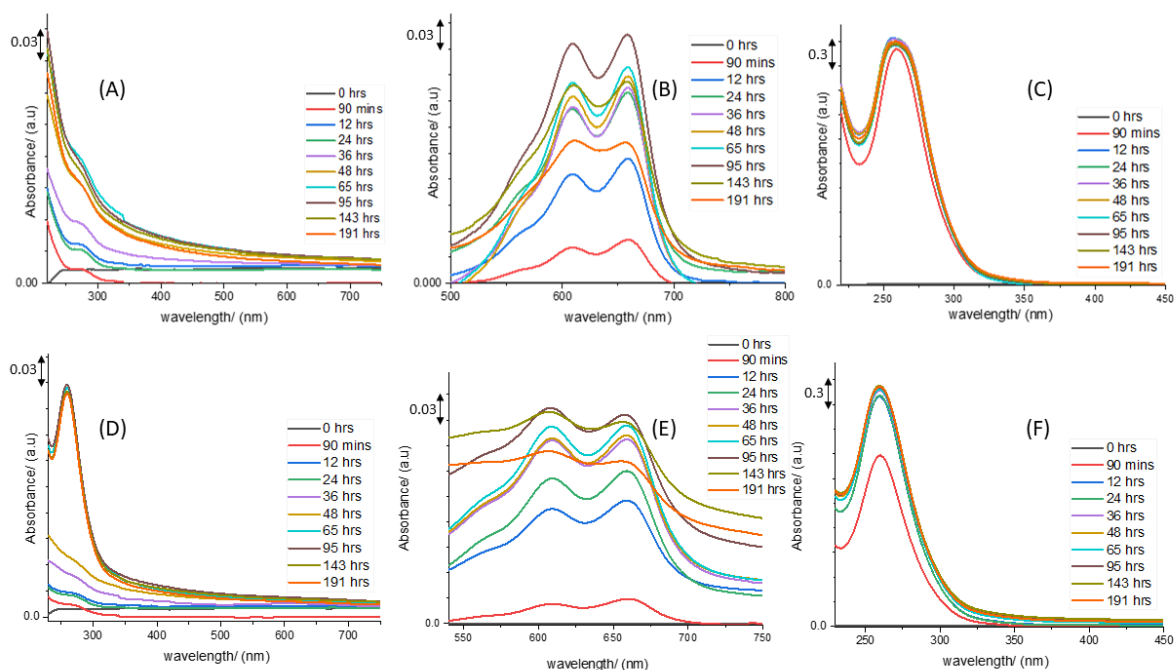

**Figure S5.** Drug release in S60 and S60-PEG niosomes as monitored by UV-Visible spectroscopy: (A) S60 niosomes (in the absence of drugs), (B) S60+MTX niosomes, (C) S60+KTP niosomes, (D) S60-PEG niosomes, (E) S60-PEG+MTX niosomes and (F) S60-PEG+KTP niosomes.

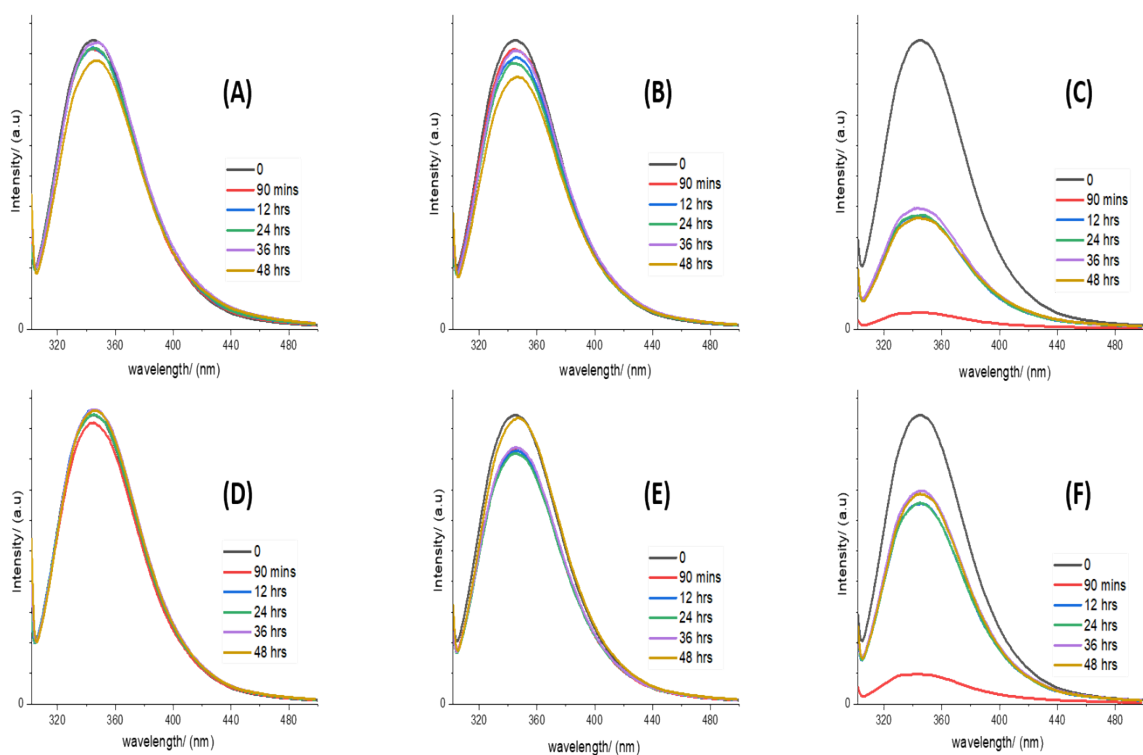

**Figure S6.** Fluorescence profiles showing the interaction of niosomes (in the presence and absence of drugs) (A) S60, S60+MTX and S60+KTP and (B) S60-PEG, S60-PEG+MTX and S60-PEG+KTP with 0.06 mM HSA as assessed by dialysis methods.

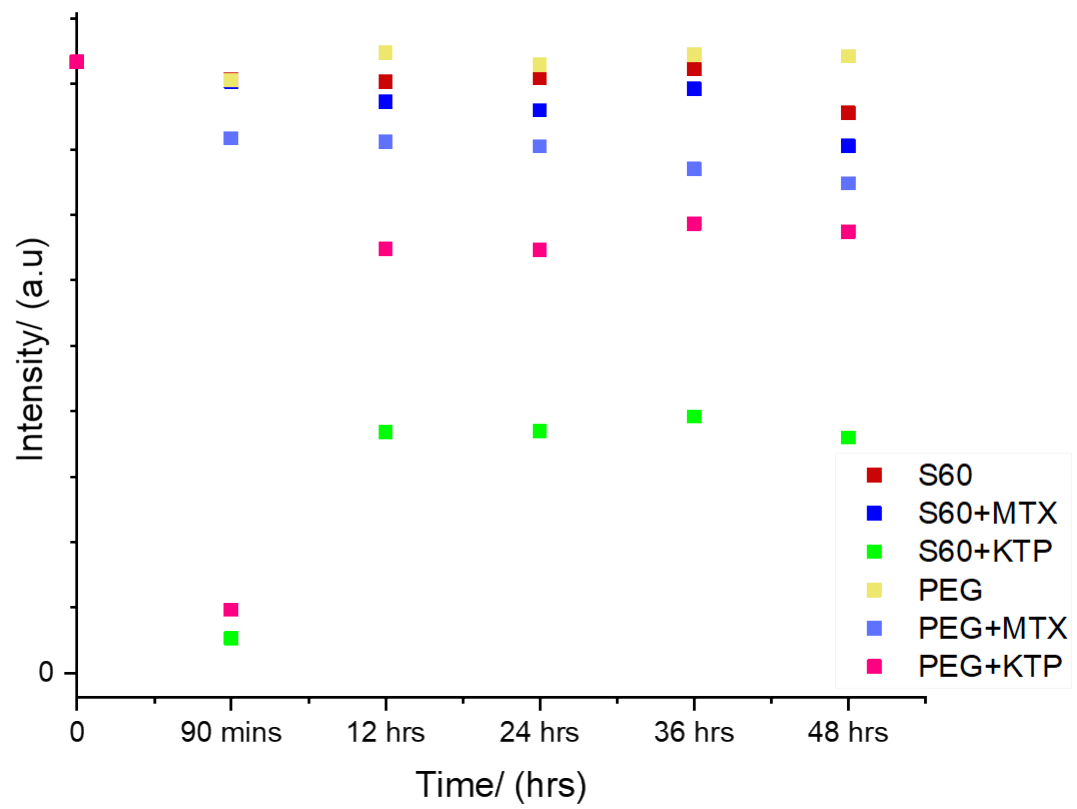

**Figure S7.** Integrated fluorescence emission profiles showing the interaction of niosomes (in the presence and absence of drugs) with 7  $\mu$ M HSA assessed by dialysis.
